# Supplementary material for: In-Depth Analysis and Defect Reduction for Ethiopian Cotton Spinning Industry Based on TQM Approach
Source: Hindawi journal article supplement (doi:10.1155/2020/5792434), 2020-04-23
Supplement: f1 [file 5792434.f1.xlsx]

## Sheet: types of defect occor in ring
types of defect		types of defect	%age
Uneven Yarn	no	Types of defect	BD	KOM		AD	Av %age
	1	Uneven Yarn	15	13		12	13.3333				types of defect	%age
	2	Count Variation Between Cops	7	8		6	7			no	Types of defect	13
Count Variation Between Cops	4	Crackers in the Yarn	10	11		13	11.3333			1	Uneven Yarn	8
	5	Thick and Thin Places in Yarn	42	38		33	37.6667			2	Count Variation Between Cops	11
	6	Slubs	20	20		22	20.6667			4	Crackers in the Yarn	38
	7	End Breaks in Ring Spinning	4	9		10	7.66667			5	Thick and Thin Places in Yarn	20
	8	High Yarn Hairiness	2	1		4	2.33333			6	Slubs	9
			100	100		100	100			7	End Breaks in Ring Spinning	1
							0			8	High Yarn Hairiness	100
		Types of defect	BD	%age of defect	Comulative %age of defect	Ada	%age of defect	Comulative %age of defect
Crackers in the Yarn		Thick and Thin Places in Yarn	42	36.15	36.15	33	37.05	37.05
		Uneven Yarn	20	31.21	67.36	12	21.07	58.12
		Slubs	15	13.04	80.4	22	16.68	74.8
		Crackers in the Yarn	10	6.5	86.9	13	9.83333	84.6333
Thick and Thin Places in Yarn		Count Variation Between Cops	7	8	94.9	6	7	91.6333
		End Breaks in Ring Spinning	4	4	98.9	10	6	97.6333
		High Yarn Hairiness	2	1	99.9	4	2.33333	99.9667
				99.9
Slubs
End Breaks in Ring Spinning
High Yarn Hairiness
Low Yarn Strength

## Sheet: cause of ring yarndefect
	types of defect	cause of defect
1	Uneven Yarn	un even roving
		Bottom rollers eccentric and vibrating, and lapping on rollers
		Long roving piecing
		Broken or damaged roving guide
2	Count Variation Between Cops	Variation in average sliver weight
		Improper use of break drafts in DF
		Stretch in draw frame sliver fed to roving.
		Lower twist in roving.
4	Crackers in the Yarn	Mixing cottons differeing widely in staple length
		Inadequate top rollers pressure
		Improper cradle holders
5	Thick and Thin Places in Yarn	immature fibres.
		High fibre length variation
		Eccentric top and bottom rollers
		Insufficient pressure on top rollers
6	Slubs	Excessive short fibres in the mixing
		Improper piecing in roving
		Bad piecing with too long overlap
7	End Breaks in Ring Spinning	Break draft not optimum.
		Incorrect shore hardness of top rollers
		Excessive twist in roving
8	High Yarn Hairiness
10	Low Yarn Strength	imature fiber
		short fiber
		low twist in ring

## Sheet: cause of defect in roving
	High Variation in Roving	varation in draw frame sliver
		Stretching of sliver at feed
		Irregular or clogged aprons
		Inadequate top arm pressure
	high breakage in roving	excessive pressure in top roller
		Improper piecing at back process
		Stretching of sliver at feed
	Roller Laps	Improper ambient conditions in the department
		Damaged surface in the top roller cots
		improper use of spacer
	Slubs	Excessive end breaks.
		Waste accumulation at creels
		Damaged or absence of top and bottom roller cloth
		improper handling in transport

## Sheet: Persentage in roving
No	Types of defect	%age
		BD	Kom	Ada	av
1	High count Variation in Roving	7	10	6	7.66667
2	high breakage rate in roving	22	23	20	21.6667
3	Roller Laps	53	51	56	53.3333
4	Slubs	18	16	18	17.3333
		100	100	100	100
	Types of defect	%age
	Types of defect	BD	Kom	Ada	%age of defect	Comulative %age of defect
	Roller Laps	53	51	56	53.3333	53.3333
	High breakage rate in roving	22	23	20	21.6667	75
	Slubs	18	16	18	17.3333	92.3333
	High count Variation in Roving	7	10	6	7.66667	100
		100	100	100	100
	Types of defect	%age of defect	Cumulative %age of defect
	Roller Laps	51.23	51.23
	High breakage rate in roving	22.8	74.03
	Slubs	16.14	90.17
	High count Variation in Roving	9.83	100
		100	200

## Sheet: cause of defect in draw frme
	High Drawing Sliver count Variation	Improper pressure on top rollers
		Variation in top roller coating
		Worn top roller end bushes
	Roller Lapping in Draw Frame	Improper humidity
		Excessive top roller pressure
		Inadequate suction in the pneumafil
		Excessive trash in the feed material
	Impurities in Sliver	Pneumafil suction ineffective
		high dust particle
	End Breaks in Drawing	improper ambient condition
		honey dew
		in adiquate top roller pressure

## Sheet: persentage defect in df
		%age
	types of defect	BD	Kom	Ada	av
	High Drawing Sliver count Variation	5	7	8	6.66667
	Roller Lapping in Draw Frame	65	60	54	59.6667
	Impurities in Sliver	13	14	18	15
	End Breaks in Drawing	17	19	20	18.6667
		100	100	100	100
	types of defect	BD	Kom	Ada	%age of defect	Comulative %age of defect
	Roller Lapping in Draw Frame	65	60	54	59.6667	59.6667
	End Breaks in Drawing	17	19	20	18.6667	78.3333
	Impurities in Sliver	13	14	18	15	93.3333
	High Drawing Sliver count Variation	5	7	8	6.66667	100
		100	100	100	100
	Types of defect	%age of defect	Cumulative %age of defect
	Roller Lapping in Draw Frame	66.32	66.32
	End Breaks in Drawing	16.22	82.54
	Impurities in Sliver	9.83	92.37
	High Drawing Sliver count Variation	7.63	100
	Total	100

## Sheet: cause of defect in carding
	High Card Sliver Variation	• Bent / damaged back and front plate
		• Feed roller weighting not acting properly.
	NEP Formation in Cards	High lickerin speeds
		un even flat setting
		rough surface in front and back plate.
		• lunt lickerin wire or dull flats
	high waste generation	high short fiber in the raw material
		high trash content in the raw material
	impurites in sliver	high trash content in the raw material
		dull licker in wire
	irregularity in card sliver

## Sheet: Persentage in card
		%age
	types of defect	BD	Kom	Ada	av
	High Card Sliver Variation	19	22	20	20.3333
	NEP Formation in Cards	28	27	28	27.6667
	high waste generation	38	35	32	35
	impurites in sliver	15	16	20	17
		100	100	100	100
	types of defect	BD	Kom	Ada	%age of defect	Comulative %age of defect
	High waste generation	38	35	32	35	35
	NEP Formation in Cards	28	27	28	27.6667	62.6667
	High Card Sliver Variation	19	22	20	20.3333	83
	Impurites in sliver	15	16	20	17	100
		100	100	100	100
	types of defect	%age of defect	Cumulative %age of defect	Cumulative %age of defect
	High waste generation	35.24	35.24
	NEP Formation in Cards	26.31	61.55
	High Card Sliver Variation	21.35	82.9
	Impurites in sliver	17.1	100
	Total	100

## Sheet: cause  of defect in blow room
1	High Variation in chute	Use of excessive softwaste in the mixing
		Uneven mixing of soft waste with cotton
		Extreme variation in the ambient condition in the department
2	NEP Formation in Blow Room	Cottons with too low moisture
		Extremely fine cottons with high trash content
3	Excessive Lint Loss	Uneven mixing of soft waste
		High short fibre content in cotton
		Lower beater speeds
4	waste generation	High short fibre content in cotton
		high trash content on cotton
5	Low cleanning efecency	low air pressure

## Sheet: persentage in br
per		%age
	Types of waste	BD	Kom	Ada	Av
	High Variation in chute	4	8	6	6
	NEP Formation in Blow Room	10	10	12	10.6667
	Excessive Lint Loss	3	3	5	3.66667
	waste generation	75	70	67	70.6667
	Low cleanning efecency	8	9	10	9
		100	100	100	100
		%age
	Types of waste	BD	Kom	Ada	%age of defect	Comulative %age of defect
	waste generation	75	70	67	70.6667	70.6667
	NEP Formation in Blow Room	10	10	12	10.6667	81.3333
	Low cleanning efecency	8	9	10	9	90.3333
	High Variation in chute	4	8	6	6	96.3333
	Excessive Lint Loss	3	3	5	3.66667	100
	Types of waste
	waste generation	70.66	70.66
	NEP Formation in Blow Room	10.66	81.32
	Low cleanning efecency	9	90.32
	High Variation in chute	6	96.32
	Excessive Lint Loss	3.66	99.98
	Types of waste	%age of defect	Cumulative %age of defect
	Waste generation	70.47	70.47
	NEP formation in Blow Room	10.96	81.43
	Low cleaning efficiency	8.36	89.79
	High Variation in chute	7.21	97
	Excessive Lint Loss	3	100
	Total	100

[truncated: 4 more sheets: Resualt, control, Improves, action plan]
